# Supplementary material for: Capacity of Broadly Neutralizing Antibodies to Inhibit HIV-1 Cell-Cell Transmission Is Strain- and Epitope-Dependent
Source: PubMed Central journal article supplement (PMC4497647; doi:10.1371/journal.ppat.1004966), 2015-07-09

**A** b12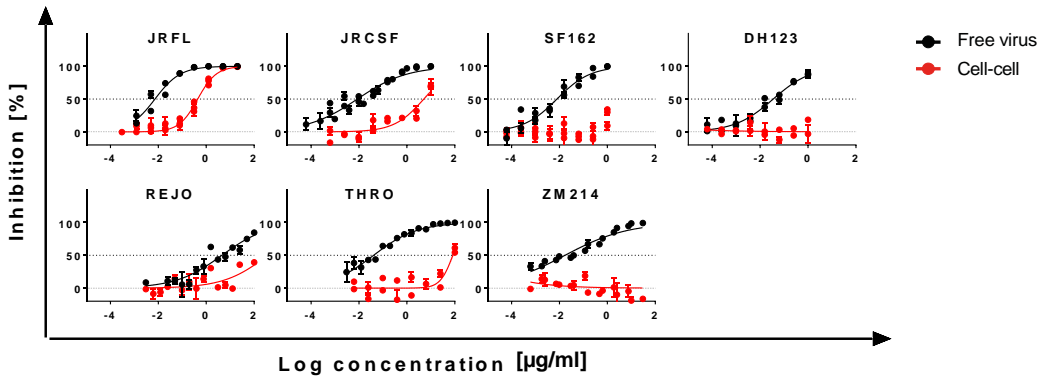**B** VRC01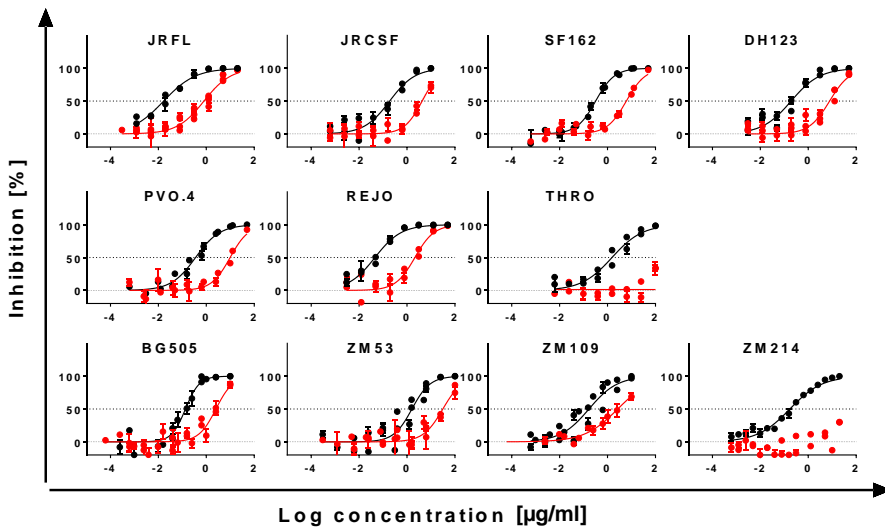**C** PGV04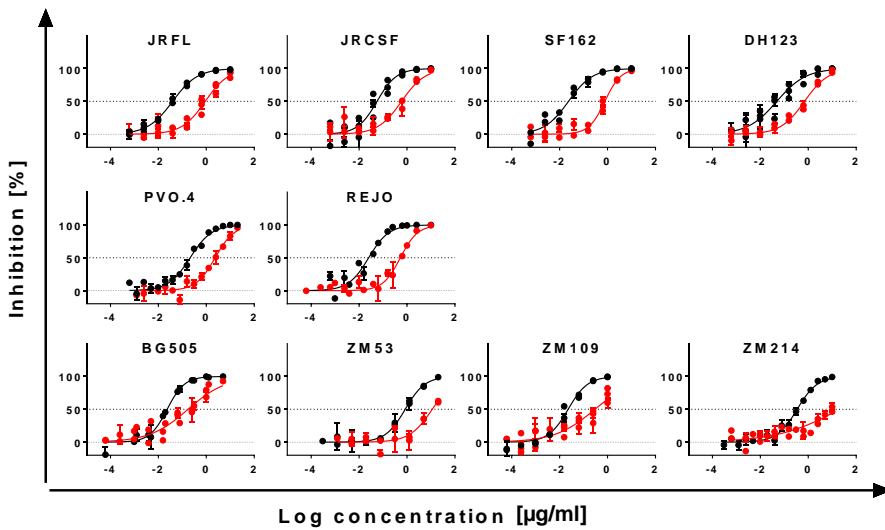

**D NIH45-46**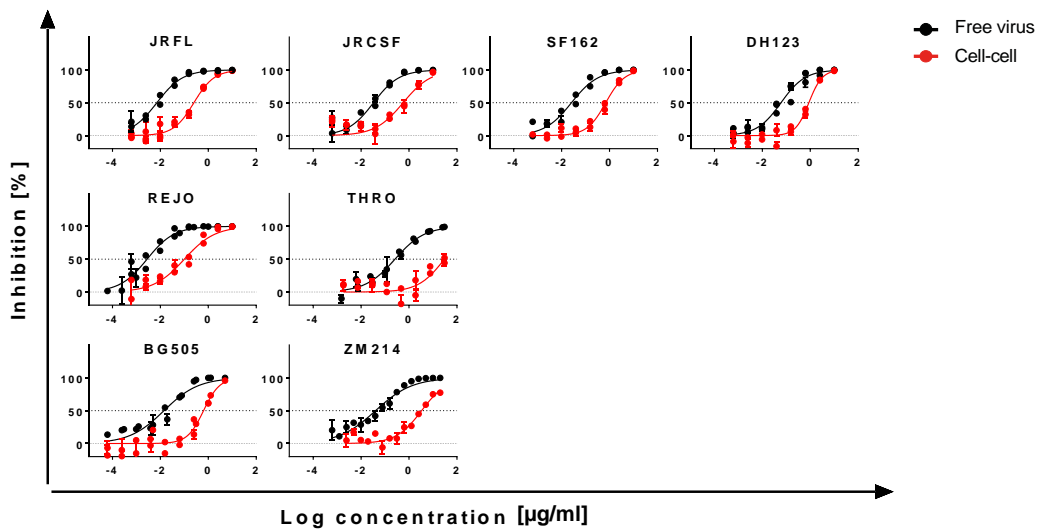**E 3BNC117**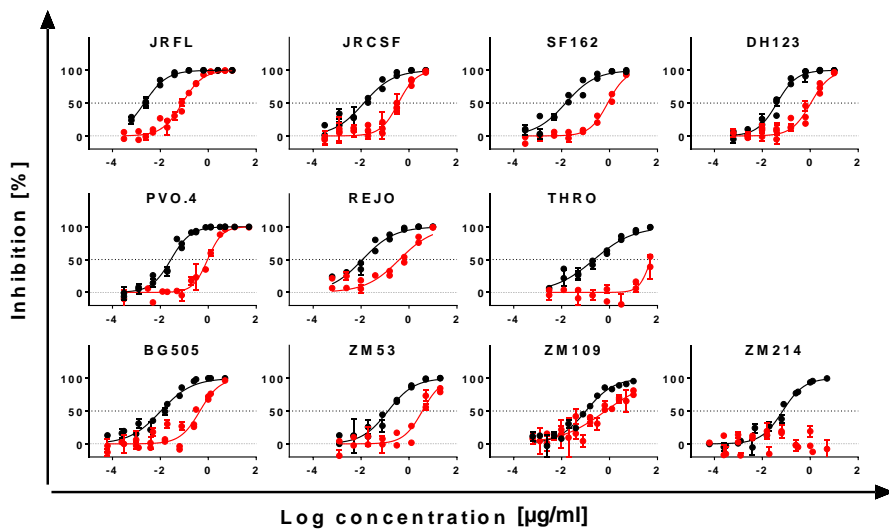**F PGT121**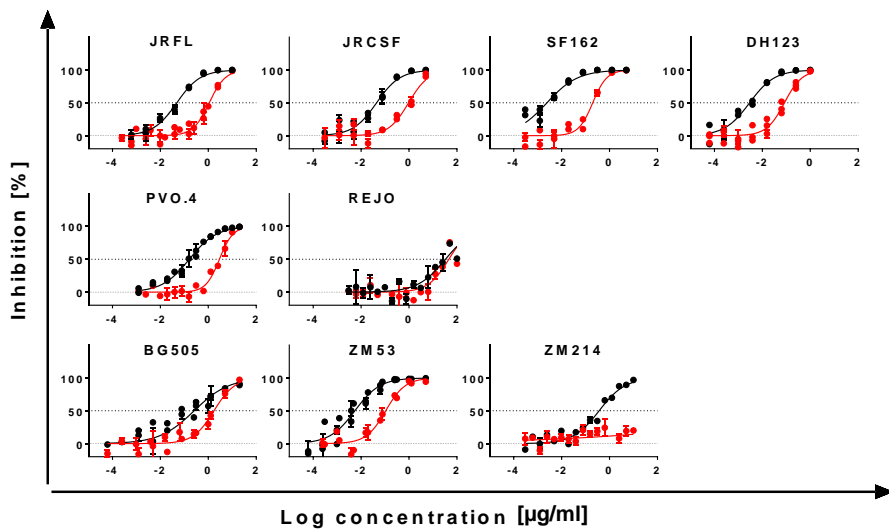

### G PGT125

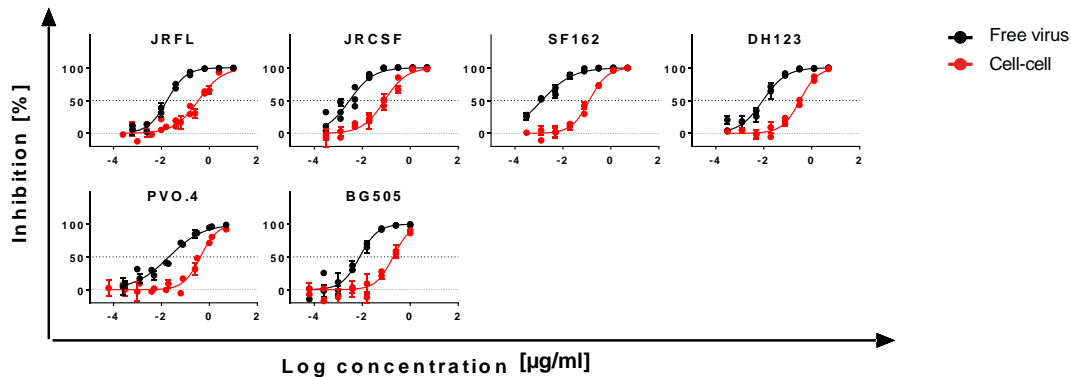

### H PGT128

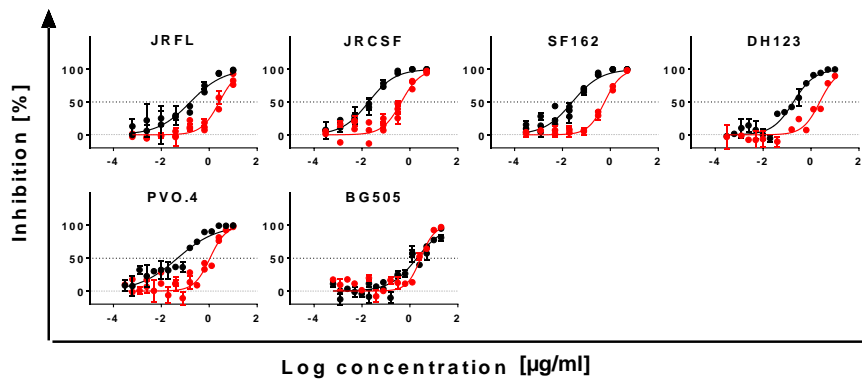

### I PGT135

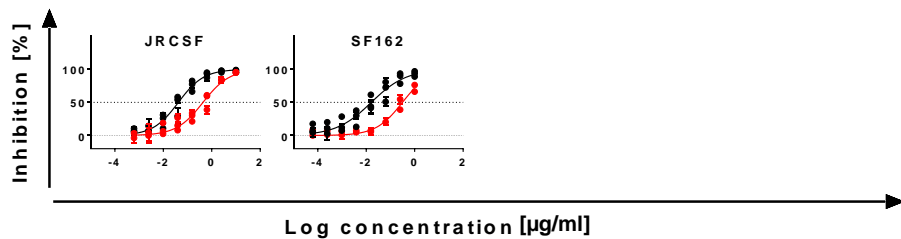

**J PGT145**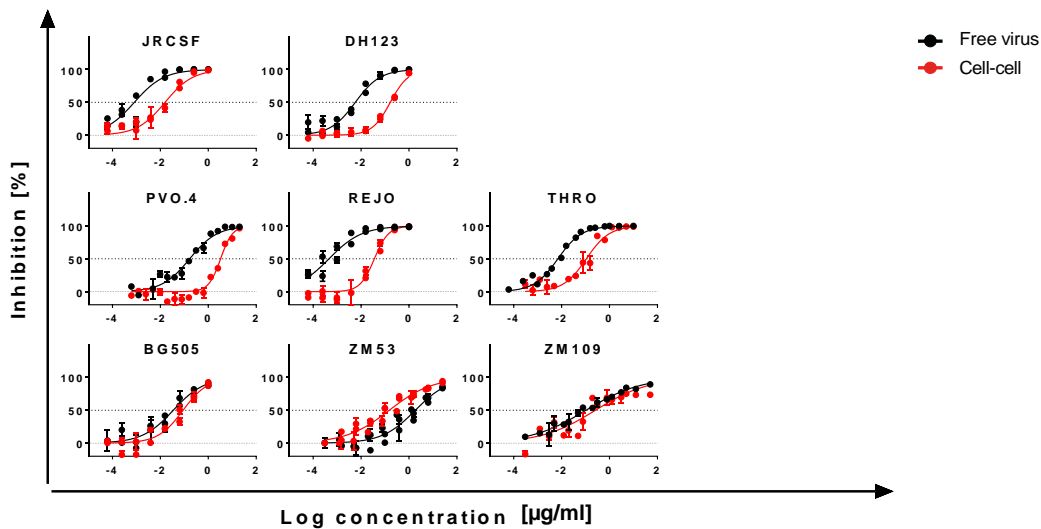**K PG9**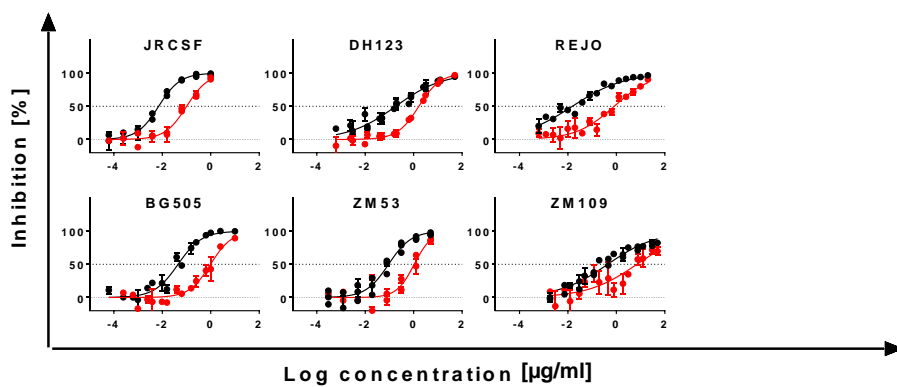**L PG16**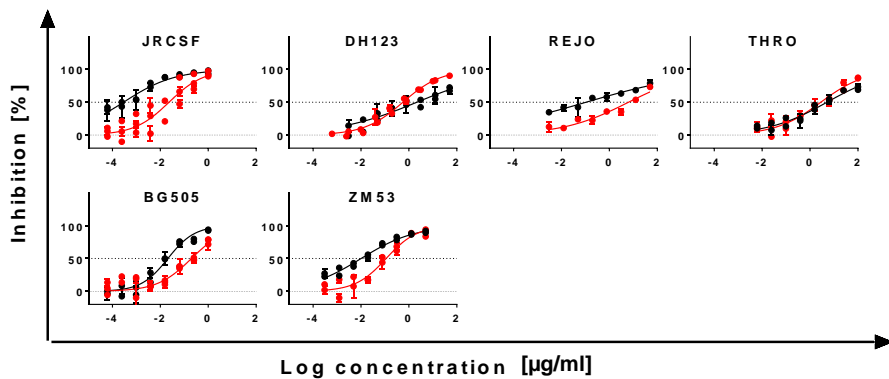**M 2G12**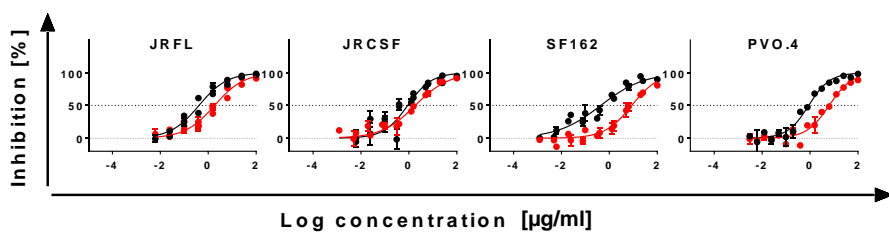

**N** 2F5

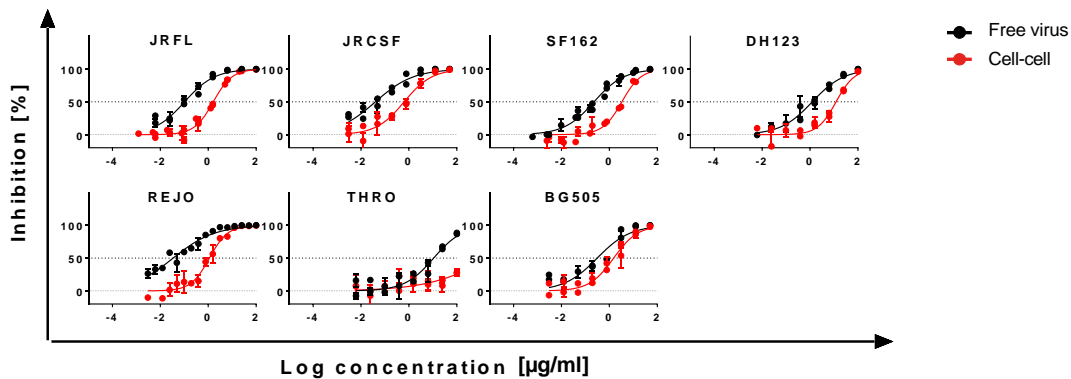

**O** 10E8

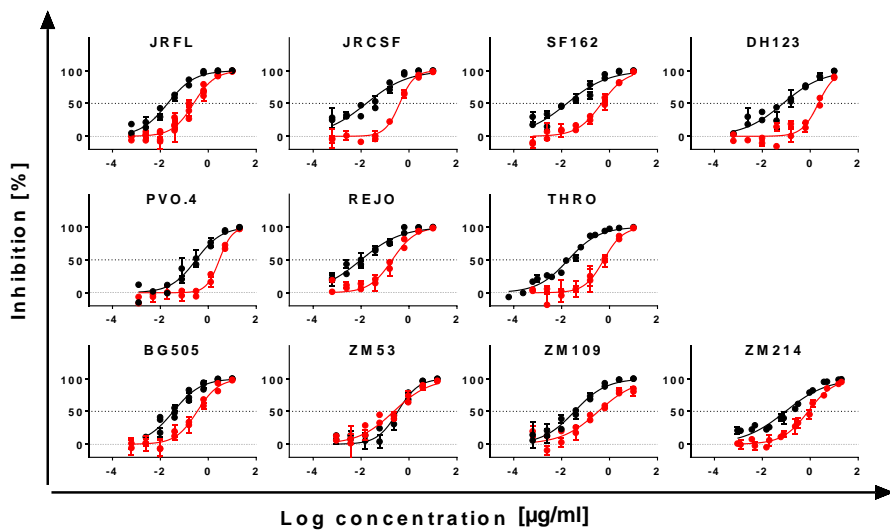

**P** 4E10

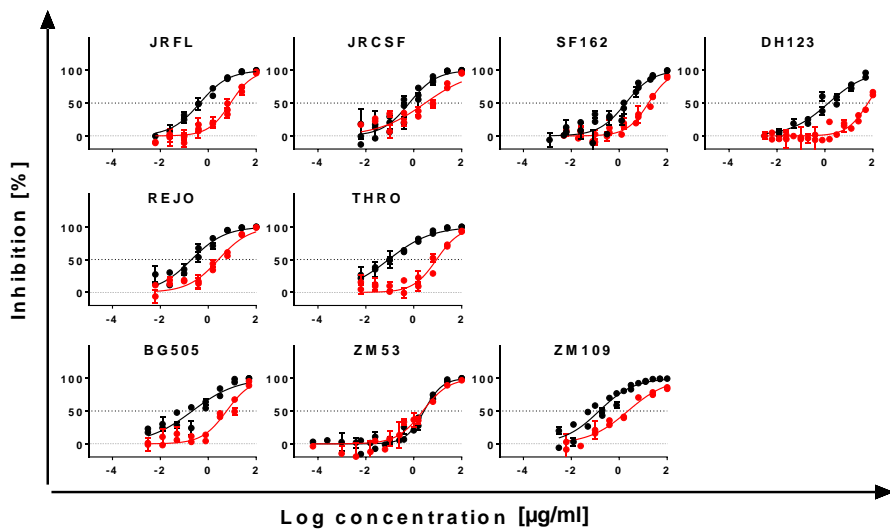

Supplement: ppat.1004966.s010.pdf [file ppat.1004966.s010.pdf]
